# Supplementary material for: Quantum spin Hall states in MX2 (M = Ru, Os; X = As, Sb) monolayers
Source: Royal Society of Chemistry journal article supplement (doi:10.1039/d4cp04025b), 2024-11-22
Supplement: d4cp04025b1.pdf [file d4cp04025b1.pdf]

## Quantum spins Hall states in $\text{MX}_2$ ( $\text{M} = \text{Ru}, \text{Os}; \text{X} = \text{As}, \text{Sb}$ )

### monolayers

Tao Jing,<sup>1,\*</sup> Dongmei Liang,<sup>1</sup> Yongchen Xiong,<sup>1</sup> Jun Zhang,<sup>1</sup> Yongjin Hu,<sup>1</sup> Qin Zhang,<sup>1</sup> Dongyan Lv,<sup>1</sup> Zhi He,<sup>1</sup> Mingsen Deng,<sup>2,\*</sup>

#### AFFILIATIONS

1 School of Mathematics, Physics and Optoelectronic Engineering, and Collaborative Innovation Center for Optoelectronic Technology, Hubei University of Automotive Technology, Shiyan 442002, People's Republic of China.

2 School of information, Guizhou University of Finance and Economics, Guiyang 550004, People's Republic of China.

**Table S1** Lattice parameters of the predicted  $\text{RuAs}_2$ ,  $\text{RuSb}_2$ ,  $\text{OsAs}_2$ , and  $\text{OsSb}_2$  monolayers.

| Phase           | Lattice parameters (Å) |                     |                     |
|-----------------|------------------------|---------------------|---------------------|
|                 | 1T'                    | 1T                  | 2H                  |
| $\text{RuAs}_2$ | $a = 3.062, b = 6.360$ | $a = b = 3.109$     | $a = b = 2.978$     |
|                 | $\alpha = 90^\circ$    | $\alpha = 60^\circ$ | $\alpha = 60^\circ$ |
| $\text{RuSb}_2$ | $a = 3.273, b = 6.648$ | $a = b = 3.325$     | $a = b = 3.222$     |
|                 | $\alpha = 90^\circ$    | $\alpha = 60^\circ$ | $\alpha = 60^\circ$ |
| $\text{OsAs}_2$ | $a = 3.093, b = 6.358$ | $a = b = 3.148$     | $a = b = 3.009$     |
|                 | $\alpha = 90^\circ$    | $\alpha = 60^\circ$ | $\alpha = 60^\circ$ |
| $\text{OsSb}_2$ | $a = 3.285, b = 6.635$ | $a = b = 3.352$     | $a = b = 3.217$     |
|                 | $\alpha = 90^\circ$    | $\alpha = 60^\circ$ | $\alpha = 60^\circ$ |

**Table S2** Calculated cohesive energies for different phases of  $\text{MX}_2$  ( $\text{M} = \text{Ru}, \text{Os}; \text{X} = \text{As}, \text{Sb}$ ) monolayers.

|     | $\text{RuAs}_2$ | $\text{RuSb}_2$ | $\text{OsAs}_2$ | $\text{OsSb}_2$ |
|-----|-----------------|-----------------|-----------------|-----------------|
| 1T' | -6.17           | -5.70           | -6.69           | -6.16           |
| 2H  | -6.16           | -5.66           | -6.67           | -6.09           |
| 1T  | -6.04           | -5.57           | -6.53           | -6.00           |

**Table S3** Calculated energy oscillation intervals for different  $\text{MX}_2$  ( $\text{M} = \text{Ru}, \text{Os}; \text{X} = \text{As}, \text{Sb}$ ) monolayers after heating at 300K and 500K.

| Energy interval (eV) | $\text{RuAs}_2$ | $\text{RuSb}_2$ | $\text{OsAs}_2$ | $\text{OsSb}_2$ |
|----------------------|-----------------|-----------------|-----------------|-----------------|
| 300K                 | 0.47            | 0.55            | 0.54            | 0.49            |
| 500K                 | 0.91            | 0.70            | 0.87            | 0.75            |

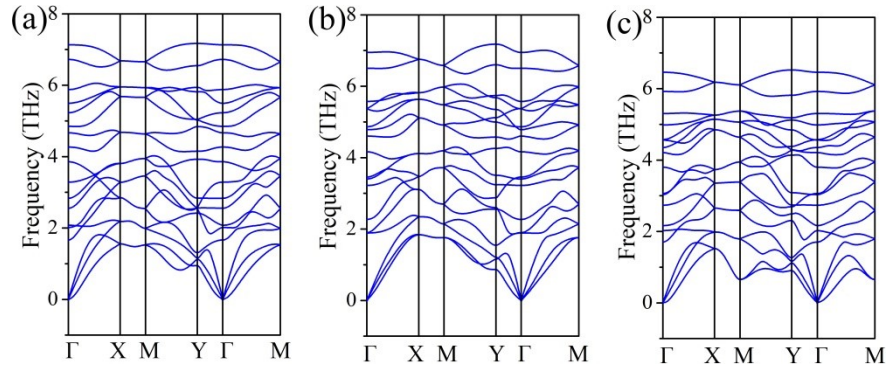

**Figure S1** Phonon dispersion of (a) RuSb<sub>2</sub>, (b) OsAs<sub>2</sub>, and (c) OsSb<sub>2</sub> monolayers, indicating that the structures are dynamically stable.

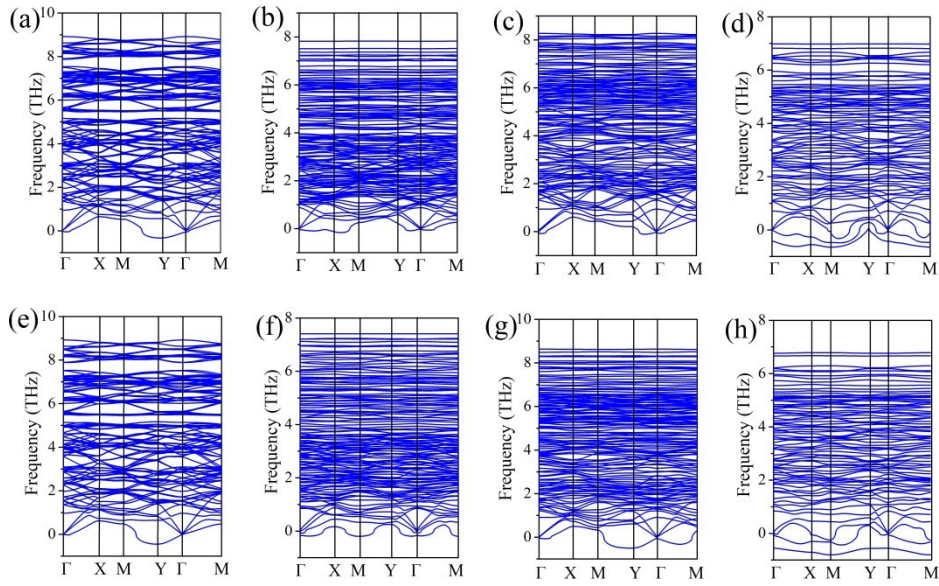

**Figure S2** Phonon dispersion of (a) RuAs<sub>2</sub>, (b) RuSb<sub>2</sub>, (c) OsAs<sub>2</sub>, and (d) OsSb<sub>2</sub> monolayers after heating at 300K for 5 ps. Phonon dispersion of (e) RuAs<sub>2</sub>, (f) RuSb<sub>2</sub>, (g) OsAs<sub>2</sub>, and (h) OsSb<sub>2</sub> monolayers after heating at 500K for 5 ps.

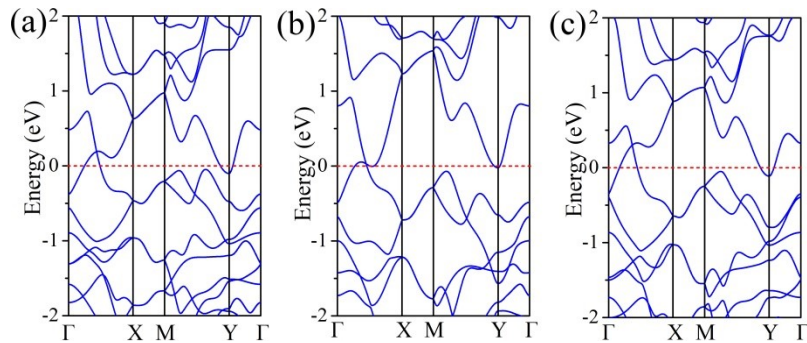

**Figure S3** Band structures of (a) RuSb<sub>2</sub>, (b) OsAs<sub>2</sub>, and (c) OsSb<sub>2</sub> monolayers without SOC.

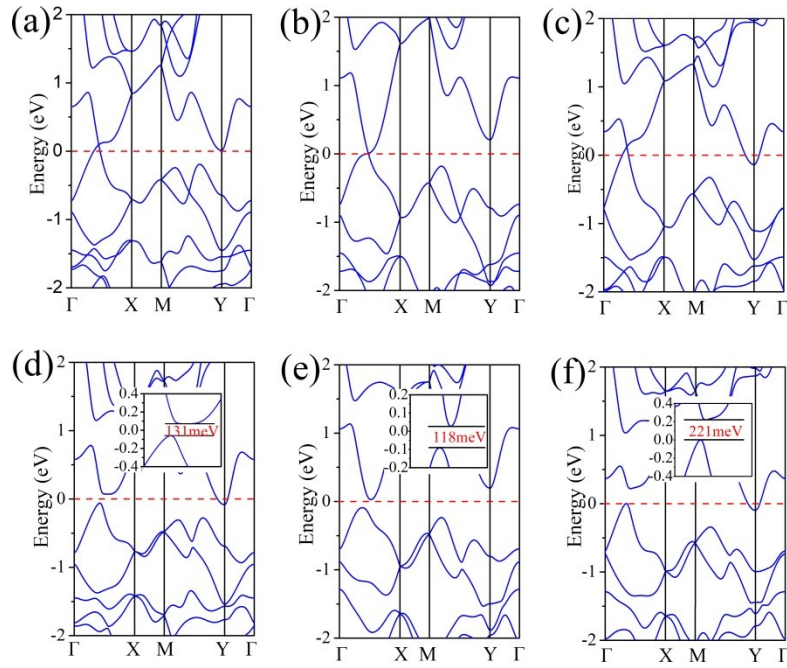

**Figure S4** Band structures of (a) RuSb<sub>2</sub>, (b) OsAs<sub>2</sub>, and (c) OsSb<sub>2</sub> monolayers without SOC. Band structures of (d) RuSb<sub>2</sub>, (e) OsAs<sub>2</sub>, and (f) OsSb<sub>2</sub> monolayers with SOC. All results are calculated using the hybrid functional (HSE06) method.

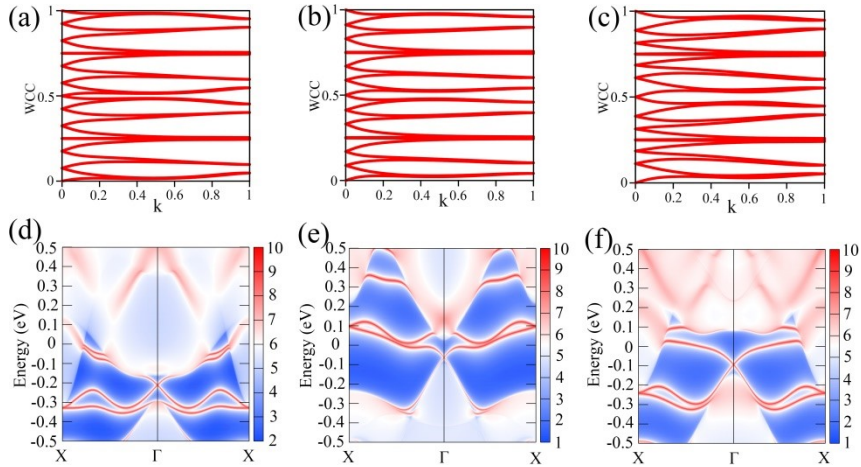

**Figure S5** Evolution of the Wannier charge center (WCC) for (a) RuSb<sub>2</sub>, (b) OsAs<sub>2</sub>, and (c) OsSb<sub>2</sub> monolayers along  $k$ . Topological edge states of the semi-infinite (d) RuSb<sub>2</sub>, (e) OsAs<sub>2</sub>, and (f) OsSb<sub>2</sub> monolayers with SOC. All results are calculated using the hybrid functional (HSE06) method.

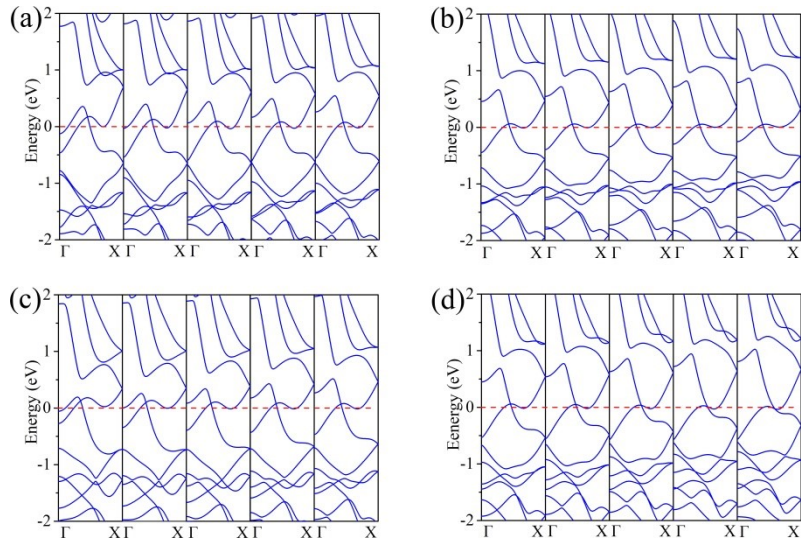

**Figure S6** Calculated band structures of RuSb<sub>2</sub> monolayers in the strain range from -5% to -1% in the (a) *x* direction and (c) *y* directions, and from 1% to 5% in the (b) *x* direction and (d) *y* directions.

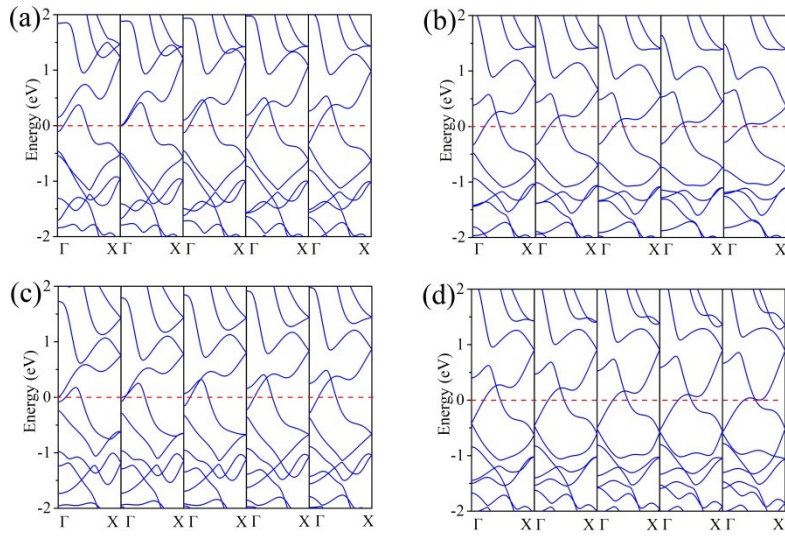

**Figure S7** Calculated band structures of OsSb<sub>2</sub> monolayers in the strain range from -5% to -1% in the (a) *x* direction and (c) *y* directions, and from 1% to 5% in the (b) *x* direction and (d) *y* directions.
